# Supplementary material for: Effects of Cardiotoxins from Naja oxiana Cobra Venom on Rat Heart Muscle and Aorta: A Comparative Study of Toxin-Induced Contraction Mechanisms
Source: MDPI journal article supplement (doi:10.3390/toxins14020088), 2022-01-24
Supplement: s1 [file s1]

# Supplementary Materials: Effects of Cardiotoxins from *Naja oxiana* Cobra Venom on Rat Heart Muscle and Aorta: A Comparative Study of Toxin-Induced Contraction Mechanisms

Alexey S. Averin, Miroslav N. Nenov, Vladislav G. Starkov, Victor I. Tsetlin and Yuri N. Utkin

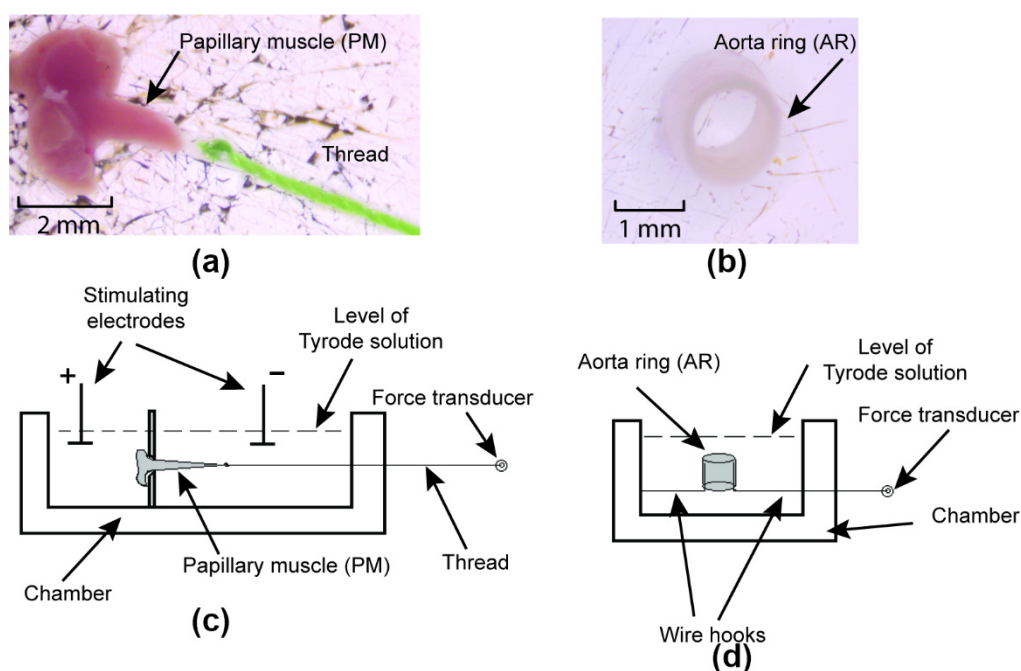

**Figure S1.** Illustration of papillary muscle and aorta ring preparations and schemes of experimental set-ups. (a) Papillary muscle preparation with a fragment of heart septum; (b) aorta ring preparation; (c) scheme of experimental chamber with papillary muscle; (d) scheme of experimental chamber with aorta ring.
